# Supplementary material for: Cultural Adaptation of Minimally Guided Interventions for Common Mental Disorders: A Systematic Review and Meta-Analysis
Source: PubMed Central journal article supplement (PMC5057065; doi:10.2196/mental.5776), 2016-09-26
Supplement: mental_v3i3e44_app3.pdf [file mental_v3i3e44_app3.pdf]

### Appendix 3. Risk of bias of individual studies

|                 | Random sequence          | Allocation concealment   | Blinding of outcome      | Incomplete outcome       |
|-----------------|--------------------------|--------------------------|--------------------------|--------------------------|
| Choi 2012       | <input type="checkbox"/> | <input type="checkbox"/> | <input type="checkbox"/> | <input type="checkbox"/> |
| Liu 2008        | ?*                       | <input type="checkbox"/> | <input type="checkbox"/> | <input type="checkbox"/> |
| Moldovan 2013   | <input type="checkbox"/> | <input type="checkbox"/> | <input type="checkbox"/> | <input type="checkbox"/> |
| Muto 2011       | <input type="checkbox"/> | <input type="checkbox"/> | <input type="checkbox"/> | <input type="checkbox"/> |
| Naeem 2014      | <input type="checkbox"/> | <input type="checkbox"/> | <input type="checkbox"/> | <input type="checkbox"/> |
| Talbure 2015    | <input type="checkbox"/> | <input type="checkbox"/> | <input type="checkbox"/> | <input type="checkbox"/> |
| Unlu Ince 2013  | ?*                       | <input type="checkbox"/> | <input type="checkbox"/> | <input type="checkbox"/> |
| Wang Urban 2014 | <input type="checkbox"/> | <input type="checkbox"/> | <input type="checkbox"/> | <input type="checkbox"/> |
| Wang Rural 2013 | <input type="checkbox"/> | <input type="checkbox"/> | <input type="checkbox"/> | <input type="checkbox"/> |

\*Randomisation was reported but with no indication of how it was carried out
